# Supplementary material for: Effective repair of endometrial injury in rats using enzyme cross-linked gelatin hydrogels with human menstrual blood-derived stem cells
Source: Royal Society of Chemistry journal article supplement (doi:10.1039/d5tb00902b), 2025-01-01
Supplement: d5tb00902b1.pdf [file d5tb00902b1.pdf]

## **Supplementary Information**

### **Effective repair of endometrial injury in rats using enzyme cross-linked gelatin hydrogel with human menstrual blood-derived stem cells**

#### **Supplementary Figure 1. Estrous cycle of rats.**

The physiological cycle of rats consists of four stages including the diestrus stage, proestrus stage, estrus stage, and metestrus stage. During the diestrus stage, the majority of cells are leukocytes with a small number of nucleated epithelial cells present. In the proestrus stage, the majority of cells are nucleated epithelial cells with a few keratinized epithelial cells lacking nuclei. The estrus stage is characterized by the presence of a large number of keratinized epithelial cells lacking nuclei. Finally, during the metestrus stage, there is a coexistence of nucleated epithelial cells, leukocytes, and keratinized epithelial cells lacking nuclei. The red arrows indicate epithelial cells, the black arrows indicate leukocytes, and the blue arrows indicate keratinized epithelial cells lacking nuclei. Scale bar = 100  $\mu\text{m}$ .

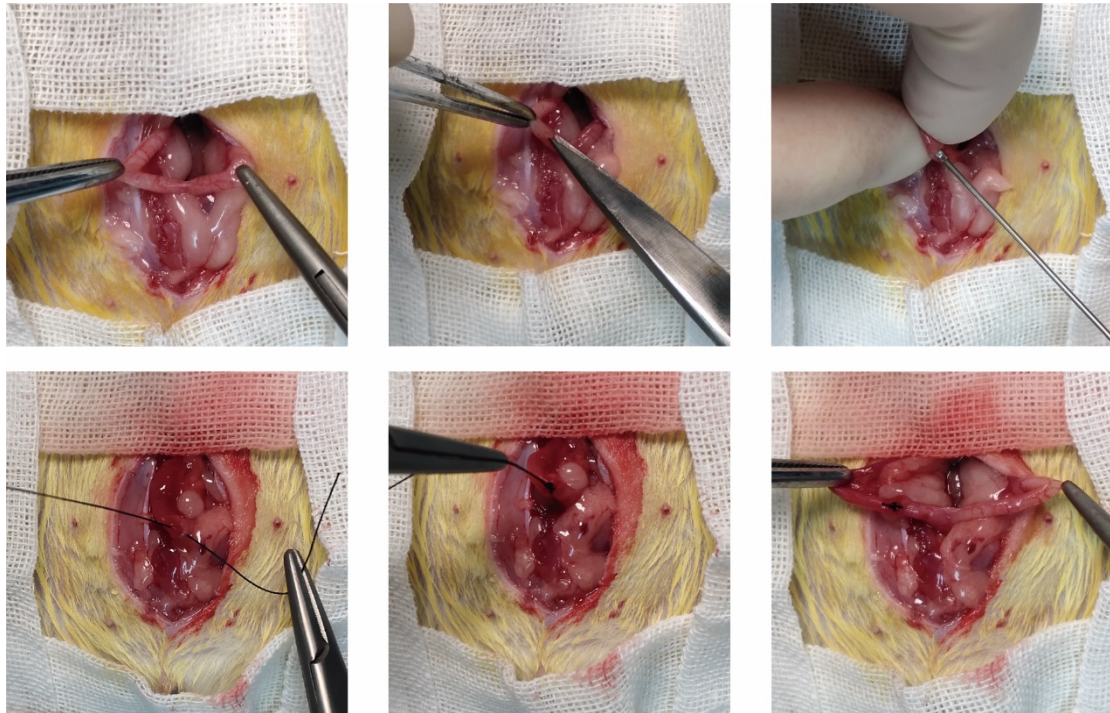

**Supplementary Figure 2. The development of model rats with endometrium injury by the surgery to open its abdominal cavity in anesthetized rats.**

Small incision was made near the vaginal opening on the right side of the rat uterus, and a curette was used to vertically scrape the endometrium. Subsequently, rat uterus and abdominal cavity were sutured sequentially.

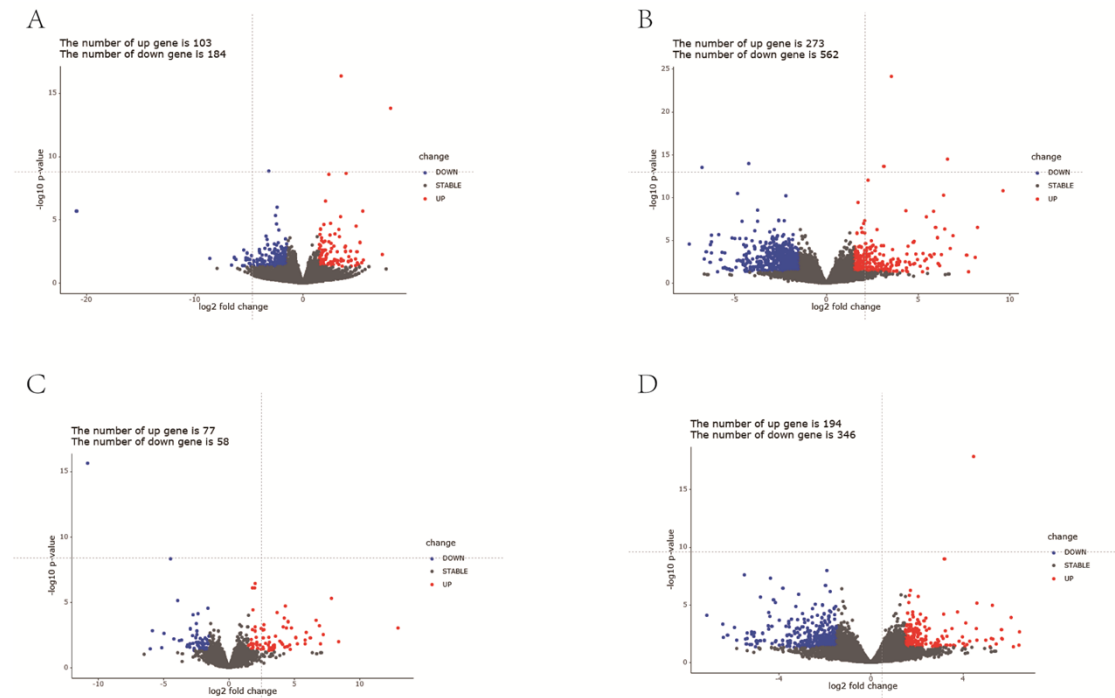

**Supplementary Figure 3. Volcano plot of gene expression in each group compared with Con group.**

**(A)** Volcano plot of gene expression in Model group and Con group. **(B)** Volcano plot of gene expression in Gel group and Con group. **(C)** Volcano plot of gene expression in MenSC/Gel group and Con group. **(D)** Volcano plot of gene expression in MenSC<sub>sp</sub>/Gel group and Con group.

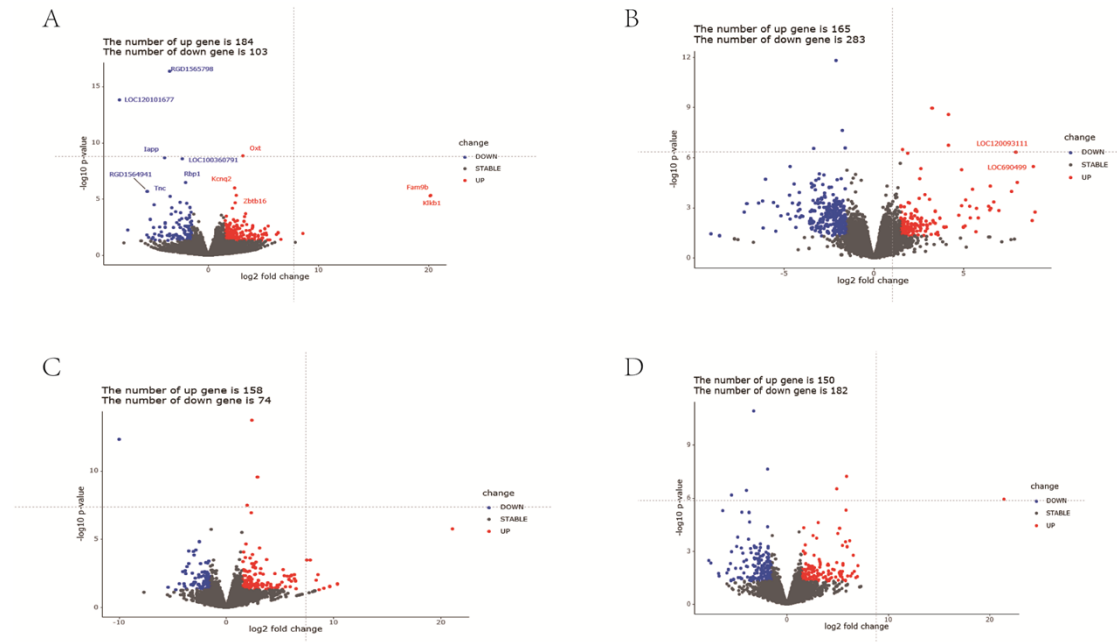

**Supplementary Figure 4. Volcano plot of gene expression in each group compared with Model group.**

**(A)** Volcano plot of gene expression in Con group and Model group. **(B)** Volcano plot of gene expression in Gel group and Model group. **(C)** Volcano plot of gene expression in MenSC/Gel group and Model group. **(D)** Volcano plot of gene expression in MenSC<sub>SP</sub>/Gel group and Model group.

**Supplementary Table 1. Antibodies and reagent kit used in this study**

| Name                      | Catalog Number | Company                   |
|---------------------------|----------------|---------------------------|
| CD44                      | 203906         | Biolegend                 |
| CD90                      | 206105         | Biolegend                 |
| CD105                     | 323214         | Biolegend                 |
| CD34                      | 343502         | Biolegend                 |
| CD45                      | 304002         | Biolegend                 |
| CCK8                      | CK04           | DOJINDO                   |
| CellTiter-Glo             | G9681          | Promega                   |
| AnnexinV-PI Apoptosis Kit | C1062L         | Beyotime                  |
| TUNEL Kit                 | C1086          | Beyotime                  |
| DAPI                      | C1006          | Beyotime                  |
| CD31                      | NB100-64796SS  | Novus                     |
| Alexa 488                 | 4408S          | Cell Signaling Technology |

**Supplementary Table 2. The table presenting all hydrogel concentration gradients**

| Gelatin concentration (w/v) | mTG Enzyme activity unit |
|-----------------------------|--------------------------|
| 5%                          | 10 U/g                   |
| 5%                          | 20 U/g                   |
| 5%                          | 30 U/g                   |
| 10%                         | 10 U/g                   |
| 10%                         | 20 U/g                   |
| 10%                         | 30 U/g                   |
| 20%                         | 10 U/g                   |
| 20%                         | 20 U/g                   |
| 20%                         | 30 U/g                   |

**Supplementary Table 3. Primers used in this study**

| Name  | Primer   | sequence                  |
|-------|----------|---------------------------|
| GAPDH | F-Primer | CAGTGCCAGCCTCGTCTCAT      |
| GAPDH | R-Primer | AGGGGCCATCCACAGTCTTC      |
| ORM1  | F-Primer | GACTGGACAAAGGATAAGTGCAG   |
| ORM1  | R-Primer | GGATCCTTCTTGGTCTCCTTC     |
| H19   | F-Primer | GATGGAGAGGACAGAAGGACAGT   |
| H19   | R-Primer | GAGAGCAGCAGAGATGTGTTAGC   |
| HOMX1 | F-Primer | GCACTATGTAAAGCGTCTCCACGAG |
| HOMX1 | R-Primer | CCAGGCAAGATTCTCCCTTACAGAG |
